# Supplementary material for: Characterization of Chemokines and Adhesion Molecules Associated with T cell Presence in Tertiary Lymphoid Structures in Human Lung Cancer
Source: Oxford University Press journal article supplement (doi:10.1158/0008-5472.can-11-0952), 2011-09-07
Supplement: 00085472can110952-sup-fig4.pdf [file 00085472can110952-sup-fig4.pdf]

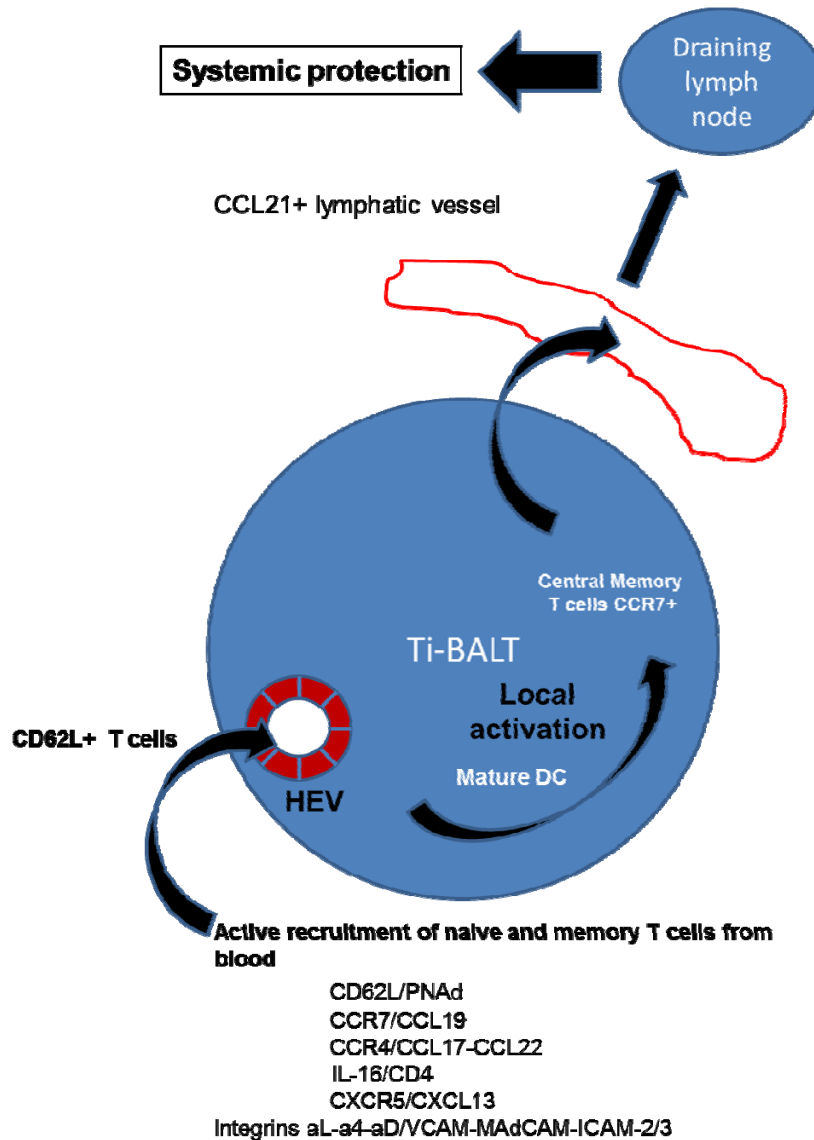

#### **Appendix A6 : Model of a role of Ti-BALT in the establishment of protective anti-tumoral immune responses**

This model recapitulates our findings and hypothesis on the migration of T cells to and from Ti-BALT, and consequences on the establishment of protective immune responses. A subset of peripheral T cells emigrates to the tumor via the HEV. This first interaction involves a unique combination of receptor/ligand pairs, as mentioned in the figure. Specific T cells encounter antigen-loaded DC in the T-cell zone. This interaction induces the differentiation of naïve T cells into effector and central-memory T cells. The central-memory T cells expressing CCR7 may leave the tumor via CCL21+ lymphatic vessels to the draining lymph node, and provide a systemic protection against tumor metastasis.
